# Supplementary material for: Negative symptoms and speech pauses in youths at clinical high risk for psychosis
Source: PubMed Central journal article supplement (PMC7822906; doi:10.1038/s41537-020-00132-1), 2021-01-22
Supplement: 41537_2020_132_MOESM1_ESM.pdf [file 41537_2020_132_MOESM1_ESM.pdf]

The full content of this file cannot be displayed with your current PDF viewer. Please update to the latest possible version to view this document.
